# Supplementary material for: Enhanced fibrinolysis detection in a natural occurring canine model with intracavitary effusions: Comparison and degree of agreement between thromboelastometry and FDPs, D-dimer and fibrinogen concentrations
Source: PLoS One. 2019 Nov 14;14(11):e0225089. doi: 10.1371/journal.pone.0225089 (PMC6855488; doi:10.1371/journal.pone.0225089)
Supplement: S1 File — Excel dataset of the patients’ clinical records included in the present study. (XLSX) [file pone.0225089.s001.xlsx]

## Sheet: Foglio1
ID	Sanguinamento	Effusion localizzation	Type of effusions	Group		Breed		Age	SEX	Kg	Fibrinogeno	FDP sq	D-dimeri	EXTEM
														A5	LI60	ML
31143	Emoaddome - rottura tumore epatico	A	Emoddome	1	1	PB	KURZHAAR	156m	FN	22.7	176	<5	0.01	22	98	4
45228	No	A	Trasudato HP	1	2	MIX	MIX	168m	M	32.5	108	5 - 20	0.08	31	32	80
45924	Emoaddome - rottura tumore retroperitoneale	A	Emoddome	1	3	PB	LABRADOR	120M	M	36	305	> 20	0.32	33	94	17
46670	No	A	Trasudato HP	1	4	PB	PASTORE TED	72m	M	39.5	148	5 - 20	0.05	24	83	46
46708	No	A + T	Trasudato HP + Trasudato HP	1	5	PB	PASTORE TED	84m	M	44	227	<5	0.01	31	85	27
50197	Tamponamento emorragico	A + T	Trasudato HP + Trasudato HP	1	6	PB	GOLDEN R	108m	M	38.8	178	5 - 20	0.05	37	88	27
51376	Emoaddome - rottura tumore splenico	A	Emoddome	1	7	PB	BOXER	96m	M	48	250	> 20	0.6	35	99	10
51759	No	T	Essudato	1	8	MIX	MIX	132m	FN	31	95	5 - 20	0.09	21	6	97
51824	Emoaddome - rottura tumore epatico	A	Emoddome	1	9	PB	SHAR PEI	84m	FN	19.3	144	5 - 20	0.03	30	100	41
51734	Emoaddome - rottura tumore splenico	A	Emoddome	1	10	MIX	MIX	120m	M	14.5	60	> 20	0.28	9	98	11
52721	No	A	Trasudato HP	1	11	PB	LABRADOR	32m	F	30	60	> 20	0.22	21	25	88
52833	No	A	Trasudato COP	1	12	PB	ROTTWEILER	36m	F	25	187	<5	0.01	42	99	9
57623	No	A	Trasudatto HP	1	13	PB	CORSO	72m	M	62.5	76	5 - 20	0.01	35	2	100
58607	Emoaddome - rottura tumore parete addominale	A	Emoddome	1	14	PB	WHIPPET	76m	FN	8.5	79	<5	0.01	7	2	100
70080	Tamponamento emorragico	A	Trasudato HP	1	15	PB	PASTORE TED	132m	M	35	240	5 - 20	0.01	49	19	100
66881	No	A	Trasudato HP	1	16	PB	BULLDOG ING	108m	M	26.2	310	5 - 20	0.09	59	92	19
71454	No	A	Trasudato HP	1	17	MIX	MIX	120m	FN	33	71	5 - 20	0.09	26	18	100
71919	Emoaddome - rottura tumore splenico	A	Emoddome	1	18	MIX	MIX	96m	M	9.7	156	> 20	0.32	21	100	3
73389	No	A + T	Trasudato HP + Trasudato HP	1	19	PB	ROTTWEILER	96m	M	56	192	> 20	0.13	37	100	12
74817	Epistassi- Piastrinopenia - Emoaddome - rottura tumore splenico	A	Emoddome	1	20	PB	PASTORE TED	120m	FN	32	59	> 20	0.66	15	100	0
75112	Emoaddome - rottura tumore splenico	A	Emoddome	1	21	PB	PASTORE TED	156m	FN	31.6	215	> 20	0.09	42	100	0
77018	No	A + T	Trasudato HP + Trasudato HP	1	22	MIX	MIX	156m	M	10.8	169	5 - 20	0.11	46	96	26
77037	No	A	Exudate	1	23	MIX	MIX	96m	MN	25.5	444	<5	0.05	62	99	5
83481	Emoaddome + Emotorace da trauma	A + T	Emoddome + Emotorace	1	24	MIX	MIX	72M	M	6.1	186	> 20	0.16	35	100	6
86009	No	A	Trasudato	1	25	PB	GOLDEN R	108M	M	39.5	420	> 20	0.01	61	99	4
88369	No	A	Trasudato HP	1	26	MIX	MIX	60m	FN	24	96	<5	0.57	27	88	47
89922	No	A	Trasudato HP	1	27	PB	JACK RUSSEL T	36m	F	7	95	<5	0.12	27	58	43
90645	No	A + T	Trasudato HP + Trasudato HP	1	28	PB	BOXER	132m	FN	28	196	<5	0.05	44	63	46
82192	No	A	Exudate	1	29	MIX	MIX	132m	FN	22.5	322	<5	0.01	76	87	18
91774	Emoaddome - rottura tumore epatico	A	Emoddome	1	30	MIX	MIX	192m	M	4	174	> 20	3.53	12	100	0
91838	No	A	Trasudato COP	1	31	PB	YORKSHIRE T	96m	FN	3.3	220	5 - 20	0.06	45	97	5
93045	No	A	Exudate	1	32	MIX	MIX	168m	FN	8	248	> 20	0.17	54	100	5
29787	No			2	1	PB	AFFENPINSCHER	84m	FN	4.4	177	<5	0.31	30	94	14
30358	No			2	2	MIX	MIX	24m	M	7	332	5 - 20	0.2	43	96	21
30759	No			2	3	MIX	MIX	156m	MN	5.9	688	5 - 20	0.45	70	95	17
30956	No			2	4	MIX	MIX	216m	F	4.8	444	5 - 20	0.07	72	98	12
31551	No			2	5	PB	CAVALIER KING CS	120m	M	9.5	493	5 - 20	0.14	60	98	15
31669	No			2	6	MIX	MIX	144m	MN	16.2	648	<5	0.26	61	99	1
32608	No			2	7	MIX	MIX	144m	M	26	324	<5	1.05	62	99	10
32749	No			2	8	PB	BOBTAIL	120m	FN	32.4	631	<5	2.63	70	99	3
33442	No			2	9	PB	CORSO	108m	F	33	153	> 20	0.36	19	100	1
29707	No			2	10	MIX	MIX	156m	MN	34	375	5 - 20	0.01	63	99	16
35365	No			2	11	MIX	MIX	84m	FN	59	257	<5	0.02	32	100	3
37490	No			2	12	MIX	MIX	108m	FN	6.7	556	<5	0.29	62	99	2
31446	No			2	13	MIX	MIX	144m	M	9.8	379	> 20	0.01	59	79	24
50610	N			2	14	MIX	MIX	132m	MN	25.2	347	<5	0.05	43	96	7
51109	No			2	15	MIX	MIX	168m	MN	19.3	371	> 20	1.13	52	98	10
52799	No			2	16	MIX	MIX	48m	F	6.8	309	5 - 20	0.01	48	98	12
49780	No			2	17	PB	SHIH-TZU	144m	FN	10.6	295	> 20	0.01	55	97	5
53421	No			2	18	PB	ROTTWEILER	108m	MN	50	430	<5	0.21	69	97	5
53589	No			2	19	PB	PASTORE TED	36m	F	27.5	316	> 20	1.94	48	99	3
52951	No			2	20	PB	ROTTWEILER	108m	M	49.8	389	5 - 20	0.16	71	99	3
55889	No			2	21	MIX	MIX	180m	FN	20	639	<5	7.81	67	100	1
61917	No			2	22	PB	PETIT BLEU DE GUASCOGNE	60m	FN	23.8	89	<5	0.04	24	82	42
61986	Trauma da investimento			2	23	PB	ZWERGPINSCHER	12m	M	6.5	839	<5	0.05	62	98	6
62857	Piastrinopenia - Ecchimosi			2	24	PB	GREYHOUND	108m	MN	35	254	> 20	0.76	26	100	8
74664	ematoma sottucutaneo - sarcoma indifferenziato			2	25	PB	BORDER COLLIE	108m	M	24.5	352	> 20	0.16	57	98	6
76536	No			2	26	PB	MALTESE	84m	F	2.3	201	<5	0.04	48	85	16
79971	No			2	27	MIX	MIX	96m	FN	30	869	<5	0.01	69	100	0
84197	Sanguinamento cutaneo post chirurgico - Von Willembrand			2	28	PB	KURZHAAR	36m	FN	23	371	<5	1.22	57	99	3
85632	No			2	29	PB	PASTORE TED	120	FN	33.6	141	<5	0.01	34	100	6
91233	No			2	30	MIX	MIX	144m	FN	11	581	<5	0.01	60	99	1
91985	No			2	31	PB	LABRADOR	72m	FN	34	830	> 20	0.63	83	99	13
92768	No			2	32	PB	GREYHOUND	84m	FN	26.5	236	5 - 20	0.04	33	100	2
